# Supplementary material
Source: publisher site journal article supplement (https://www.dovepress.com/get_supplementary_file.php?f=289755.docx)
Supplement: Supplementary file 1 [file get_supplementary_file.php]

**Oronasal versus nasal masks for non-invasive ventilation in COPD: a randomized crossover trial**

1Daniel S Majorski, 1Jens C Callegari, 1Sarah B Schwarz, 1Friederike S Magnet, 2Rodion Majorski, 3,4Jan H Storre, 5Claudia Schmoor, 1Wolfram Windisch

**Online Data Supplement**

**Material and Methods**

This trial was conducted at the Department of Pneumology, Lung Clinic, Cologne Merheim Hospital, Witten/Herdecke University, Germany. The study protocol was approved by the ethics committee at Witten/Herdecke University. The study was performed in accordance with the ethical standards laid down in the Declaration of Helsinki, and was registered at the German Clinical Trials Registry (DRKS00007741).

**Inclusion and Exclusion criteria**

COPD patients with moderate to severe airflow limitation (as defined by the Global Initiative for Obstructive Lung Disease) were included in the study (1, 2). Patients needed to have been on NIV for at least one month prior to inclusion, and in a stable disease state without any signs of acute respiratory failure (pH <7.35), respiratory infection, or worsening of symptoms during the preceding month. Patients with a body mass index (BMI) ≥35 kg/m2 were excluded from the study in order to prevent the inclusion of overlap patients predominantly suffering from obesity hypoventilation syndrome (3, 4).

**Measurements**

During the course of the study, participants underwent lung function assessment by body plethysmography (5), as well as CO-diffusion capacity tests (ZAN Bodyplethysmography, Austria), the 6-minute walk test (6MWT), and capillary blood gas analyses from the arterialized earlobe (ABL Radiometer 800 flex, Germany). Furthermore, each patient was monitored by polysomnography (PSG) (Alice Sleepwear LE 2.8.7.8, Respironics) to assess sleep quality during the interventions. This was supplemented by overnight transcutaneous PCO2 monitoring (PtcCO2; SenTec DM®, Software V-STATS 4.0; SenTec AG; Therwil, Switzerland).

**Non-invasive ventilation**

Pressure-controlled NIV in either spontaneous-timed (ST) or assisted pressure-control mode (aPCV) was applied using the same settings as those previously established for home mechanical ventilation. Patients who were already using a humidifier to decrease mouth dryness continued to use their device throughout the trial.

**Sleep studies**

Full polysomnography was performed twice in each patient (6, 7). For this purpose, sleep state was monitored by two-channel electroencephalography (EEG) and electrooculography (EOG), as well as submental electromyography (EMG). Furthermore, breathing frequency was depicted by measuring chest and abdominal motions via expandable belts (Dr. Fenyvens & Gut, Hechingen, Germany). General muscle activity was derived from EMG measurements of the bilateral anterior tibialis. Two-channel electrocardiography (ECG) was performed throughout the night. Oxygen saturation (SaO2) was measured by pulse oximetry. Breathing frequency was measured by a flowmeter pressure transducer connected to the mask, while leakage was recorded via a microphone in combination with ventilator software information. Position sensor and video analysis were used to assess body position and mask misfit during nocturnal movement. All variables were recorded on a 16-channel polygraph. Sleep state was scored in 30-second periods (6, 7). The following sleep parameters were assessed: total sleep time; sleep efficiency (sleep time divided by total time in bed); sleep stages 3 and 4 (slow wave sleep); and arousals (appearance of alpha waves in EEG that lasted at least 3 seconds).

**Study design**

The study had a randomised, open-label, two-treatment, two-period crossover design for comparison of nasal masks and oronasal masks with respect to sleep quality and nocturnal gas exchange. Lung function testing, exercise testing and blood gas analyses were performed at baseline. Participants underwent measurements for two consecutive nights, one night while breathing with a commercially available nasal mask, and one night while breathing with a commercially available oronasal mask. Ventilator settings remained unchanged during this period. Patients were randomised to receive the masks either in the sequence of nasal followed by oronasal, or oronasal followed by nasal. No changes to medication were made, and participants did not take any hypnotic or antidepressant drugs, sleep medication, or alcohol prior to the sleep trials. Patients who were already receiving long-term oxygen therapy (LTOT) in line with BTS guidelines (8) were supplied with supplemental nocturnal oxygen through a connector added to the circuit. Full PSG and PtcCO2 monitoring as well as early-morning blood gas analyses were performed during both nights whilst the patient was on the ventilator. The sequence of mask type used during the study was randomized, regardless of the type of interface that had previously been used at home. Following the 2-night sleep trial, patients were required to answer a specifically developed survey regarding their level of satisfaction with the nasal versus oronasal masks. The survey consisted of 12 different elements that could be responded to using a 100 mm Visual analogue scale (VAS) (0 = not applicable; 100 = fully applicable). At the end of the study, patients continued long-term NIV with their individually preferred interface, which was ultimately documented for the purpose of this study.

**Analysis**

Sleep efficiency served as the primary outcome. The secondary outcomes were: (i) mean nocturnal PtcCO2, (ii) the percentage of slow-wave sleep (stages 3 and 4), (iii) the percentage of REM sleep, and (iv) the results of the specifically designed patient survey, depicted on a 100mm VAS,, from which mask preferences and the associated factors were analysed.

The sample-size calculation was based on the primary endpoint of sleep efficiency. The study was planned to show a difference between the two interfaces at a two-sided significance level of 0.05 with a power of 90%, using the assumption that a minimal clinically relevant difference in sleep efficiency of 8% is present (9). Based on previous studies, we estimated the standard deviation of the difference in sleep efficiency between the two interfaces to be 12.5% (10). Using these assumptions, a sample-size of 28 randomized patients was required under the crossover design. The comparison of oronasal and nasal masks in the crossover setting was performed in the full analysis set, which included all randomised patients who received both interventions. In order to allow for potential drop-out patients, we aimed to recruit 30 patients for the final analysis. A mixed linear regression model was used in which “treatment”, “period” and “randomised sequence” were included as fixed effects, and “patient within sequence” was included as a random effect. The treatment effect was estimated using 95% confidence intervals (CIs), and tested with a two-sided level of 0.05. Separate analyses were performed for the group of patients who had regularly used nasal masks and the group of patients who had regularly used oronasal masks before the start of the study. All values are shown as mean ± SD unless stated otherwise.

# References

1. Singh D, Agusti A, Anzueto A, Barnes PJ, Bourbeau J, Celli BR, Criner GJ, Frith P, Halpin DMG, Han M, Lopez Varela MV, Martinez F, Montes de Oca M, Papi A, Pavord ID, Roche N, Sin DD, Stockley R, Vestbo J, Wedzicha JA, Vogelmeier C. Global Strategy for the Diagnosis, Management, and Prevention of Chronic Obstructive Lung Disease: the GOLD science committee report 2019. *Eur Respir J* 2019; 53.

2. Patel AR, Patel AR, Singh S, Singh S, Khawaja I. Global Initiative for Chronic Obstructive Lung Disease: The Changes Made. *Cureus* 2019; 11: e4985.

3. Mokhlesi B, Masa JF, Brozek JL, Gurubhagavatula I, Murphy PB, Piper AJ, Tulaimat A, Afshar M, Balachandran JS, Dweik RA, Grunstein RR, Hart N, Kaw R, Lorenzi-Filho G, Pamidi S, Patel BK, Patil SP, Pepin JL, Soghier I, Tamae Kakazu M, Teodorescu M. Evaluation and Management of Obesity Hypoventilation Syndrome. An Official American Thoracic Society Clinical Practice Guideline. *Am J Respir Crit Care Med* 2019; 200: e6-e24.

4. Masa JF, Pepin JL, Borel JC, Mokhlesi B, Murphy PB, Sanchez-Quiroga MA. Obesity hypoventilation syndrome. *Eur Respir Rev* 2019; 28.

5. Quanjer PH, Tammeling GJ, Cotes JE, Pedersen OF, Peslin R, Yernault JC. Lung volumes and forced ventilatory flows. Report Working Party Standardization of Lung Function Tests, European Community for Steel and Coal. Official Statement of the European Respiratory Society. *Eur Respir J Suppl* 1993; 16: 5-40.

6. Berry RB, Budhiraja R, Gottlieb DJ, Gozal D, Iber C, Kapur VK, Marcus CL, Mehra R, Parthasarathy S, Quan SF, Redline S, Strohl KP, Davidson Ward SL, Tangredi MM, American Academy of Sleep M. Rules for scoring respiratory events in sleep: update of the 2007 AASM Manual for the Scoring of Sleep and Associated Events. Deliberations of the Sleep Apnea Definitions Task Force of the American Academy of Sleep Medicine. *J Clin Sleep Med* 2012; 8: 597-619.

7. Rechtschaffen A KA. A Manual of standardized Terminology, Techniques and Scoring System for Sleep Stages in Human Subjects. . *National Institutes of Health* 1968; Washington DC.

8. Hardinge M, Annandale J, Bourne S, Cooper B, Evans A, Freeman D, Green A, Hippolyte S, Knowles V, MacNee W, McDonnell L, Pye K, Suntharalingam J, Vora V, Wilkinson T, British Thoracic Society Home Oxygen Guideline Development G, British Thoracic Society Standards of Care C. British Thoracic Society guidelines for home oxygen use in adults. *Thorax* 2015; 70 Suppl 1: i1-43.

9. Willson GN, Piper AJ, Norman M, Chaseling WG, Milross MA, Collins ER, Grunstein RR. Nasal versus full face mask for noninvasive ventilation in chronic respiratory failure. *Eur Respir J* 2004; 23: 605-609.

10. Dreher M, Ekkernkamp E, Walterspacher S, Walker D, Schmoor C, Storre JH, Windisch W. Noninvasive ventilation in COPD: impact of inspiratory pressure levels on sleep quality. *Chest* 2011; 140: 939-945.

**E-Table 1:** extended data on lung function

| **Characteristics** | **N = 30** |
| --- | --- |
| FEV1 after bronchodilation [l] | 0.77 ± 0.24 |
| FEV1 after bronchodilation [%pred] | 33.5 ± 12.9 |
| FVC [l] | 1.63 ± 0.63 |
| FVC [% pred] | 52.5 ± 13.9 |
| FEV1/FVC ratio [%pred] | 50.9 ± 18.3 |
| TLC [l] | 6 ± 1.96 |
| TLC [%pred] | 114.2 ± 23.2 |
| RV [l] | 4.27 ± 1.9 |
| RV [%pred] | 185.9 ± 79.5 |
| Raw tot [kPa/l*s] | 1.1 ± 0.5 |
| Raw tot [%] | 381.4 ±181 |
| sRAW tot [kPa*s] | 5.5± 3.3 |
| sRAWtot [%] | 623.2 ±368 |
| DLco [mmol/kPa/min] | 2.8 ±1.3 |
| DLco [%] | 36.6 ±16.2 |
| Kco [mmol/kPa/min/l] | 0.82 ±0.3 |
| Kco [%] | 57.6 ±21.3 |

**Abbreviations:** FEV1 = forced expiratory volume in one second; FVC = forced vital capacity; RV = residual volume; TLC = total lung capacity; Raw tot = airway resistance; sRAWtot = specific airway resistance; DLco = transfer factor; Kco = Krogh´s Index

**E-Table 2:** Mask Interface and ventilator settings

| **ID** | **Interface at t0** | **Ventilation mode** | **Ventilator** | **IPAP** | **EPAP** | **BF** | **Oxygen at night** | **Leakage** | **Humidifier** |
| --- | --- | --- | --- | --- | --- | --- | --- | --- | --- |
| **1** | Quattro Fx | aPCV | VIVO 40 | 30 | 5 | 16 | 1 | Passive | Yes |
| **2** | True Blue | aPCV | VSIII | 28 | 6 | 18 | 1 | Active | Yes |
| **3** | Quattro Fx | aPCV | VIVO 50 | 27 | 5 | 20 | 3 | Passive | Yes |
| **4** | Quattro Fx | ST | Stellar 100 | 22 | 5 | 18 | 3 | Passive | Yes |
| **5** | Quattro Fx | aPCV | Stellar 100 | 26 | 7 | 18 | 1 | Passive | Yes |
| **6** | Quattro Fx | aPCV | Stellar 150 | 26 | 6 | 18 | 2 | Passive | Yes |
| **7** | Flexi Fit 432 | ST | VIVO 30 | 22 | 5 | 18 | 0 | Passive | No |
| **8** | Mirage Quattro | ST | Ventimotion | 22 | 4 | 16 | 2 | Passive | No |
| **9** | Mirage Fx | aPCV | Stellar 100 | 30 | 5 | 18 | 4 | Passive | No |
| **10** | Quattro Fx | aPCV | VIVO 50 | 28 | 7 | 17 | 0 | Active | Yes |
| **11** | Liberty | aPCV | VIVO 50 | 28 | 5 | 18 | 5 | Passive | Yes |
| **12** | Flexi Fit 431 | aPCV | Ventilogic | 27 | 5 | 16 | 0 | Active | No |
| **13** | Opus | ST | Synchrony ST | 28 | 5 | 19 | 2 | Passive | No |
| **14** | Flexi Fit 431 | aPCV | Stellar 100 | 29 | 7 | 16 | 0 | Passive | Yes |
| **15** | Quattro Air | aPCV | Stellar 100 | 28 | 5 | 20 | 2 | Passive | Yes |
| **16** | HC 407 | aPCV | VIVO 50 | 27 | 5 | 16 | 2 | Active | Yes |
| **17** | Quattro Air | aPCV | Stellar 100 | 28 | 5 | 15 | 2 | Passive | Yes |
| **18** | Quattro FX | aPCV | Stellar 100 | 24 | 5 | 18 | 2 | Passive | No |
| **19** | Air Fit | ST | Stellar 100 | 25 | 8 | 15 | 0 | Passive | Yes |
| **20** | Comfort Full | aPCV | VIVO 50 | 28 | 5 | 16 | 1 | Active | Yes |
| **21** | Wisp 1 | ST | Stellar 100 | 23 | 5 | 16 | 4 | Passive | No |
| **22** | Quattro Air | aPCV | Stellar 100 | 24 | 5 | 14 | 2 | Passive | Yes |
| **23** | Ultra Mirage | aPCV | VIVO 50 | 28 | 5 | 18 | 2 | Active | Yes |
| **24** | Mirage FX | aPCV | Trilogy 100 | 30 | 6 | 18 | 5 | Passive | No |
| **25** | Airfit | aPCV | Stellar 100 | 25 | 5 | 18 | 1 | Passive | Yes |
| **26** | Ultra mirage | ST | Stellar 100 | 23 | 5 | 16 | 3 | Passive | Yes |
| **27** | Individual | aPCV | Ventilogic | 22 | 4 | 17 | 3 | Active | Yes |
| **28** | Quattro Air | aPCV | Stellar 100 | 22 | 5 | 16 | 0 | Passive | Yes |
| **29** | Amara View | aPCV | Stellar 100 | 25 | 5 | 16 | 1 | Passive | Yes |
| **30** | Mirage Fx | aPCV | Stellar 100 | 25 | 5 | 16 | 4 | Passive | Yes |
|  |  |  |  | **26** | **5.33** | **17** | **1.93** |  |  |

**E-Table 3:** Mean answers to questions in subjective satisfaction evaluation.

|  | **Nasal mask** | **Oronasal mask** | ***P-*value** |
| --- | --- | --- | --- |
| **Q1** | 45 | 53 | 0,32 |
| **Q2** | 44 | 48 | 0,72 |
| **Q3** | 46 | 49 | 0,72 |
| **Q4** | 80 | 85 | 0,30 |
| **Q5** | 87 | 85 | 0,73 |
| **Q6** | 53 | 49 | 0,68 |
| **Q7** | **77** | **54** | **0,01** |
| **Q8** | **82** | **47** | **>0,001** |
| **Q9** | **75** | **56** | **0,03** |
| **Q10** | 50 | 44 | 0,4 |
| **Q11** | 65 | 65 | 0,94 |
| **Q12** | 76 | 77 | 0,82 |

Q1: “I slept well“

Q2: “I fell asleep quickly”

Q3: “I woke up a lot”

Q4: “I had to go to the bathroom a lot”

Q5: “I had trouble breathing at night”

Q6: “I was satisfied with the mask”

Q7: “The mask was leaking so that air could escape around the eyes”

Q8: “The mask was leaking so that air could escape in the area of the chin/mouth corner/cheek”

Q9: “The air noise of the mask disturbed me”

Q10: “I had mouth dryness”

Q11: “The mask caused bruises”

Q12: “I had anxiety under the mask”

**E-Table 4:** Individual comparison of subjective evaluation of sleep and objective sleep efficiency concerning differences between nasal masks and full-face masks

|  |  |  |  |  | |  |
| --- | --- | --- | --- | --- | --- | --- |
| **Patient** | **∆ mean VAS for subjective evaluation** | **∆ Sleep Efficiency/PSG [%]** | **Patients’ preference** | |
| 1O | 29 | 28 | Oronasal mask | |
| 2N | -22 | -12 | Nasal mask | |
| 3O | 8 | 6 | Nasal mask | |
| 4O | 14 | -31 | Oronasal mask | |
| 5O | -32 | 4 | Nasal mask | |
| 6O | 25 | 59 | Oronasal mask | |
| 7O | 3 | 42 | Oronasal mask | |
| 8O | 20 | 12 | Oronasal mask | |
| 9N | 8 | 27 | Nasal mask | |
| 10O | -2 | -24 | Oronasal mask | |
| 11O | -11 | 13 | Nasal mask | |
| 12O | -4 | -1 | Oronasal mask | |
| 13N | -3 | -7 | Oronasal mask | |
| 14O | 18 | 19 | Oronasal mask | |
| 15O | -29 | -15 | Nasal mask | |
| 16N | -8 | 26 | Oronasal mask | |
| 17O | -30 | 1 | Nasal mask | |
| 18O | -17 | 18 | Nasal mask | |
| 19N | -39 | 23 | Nasal mask | |
| 20O | 18 | 65 | Oronasal mask | |
| 21N | 8 | -31 | Oronasal mask | |
| 22O | -7 | -3 | Nasal mask | |
| 23O | -25 | 21 | Nasal mask | |
| 24N | -24 | -41 | Nasal mask | |
| 25N | 27 | 3 | Oronasal mask | |
| 26O | 5 | 12 | Oronasal mask | |
| 27O | 25 | 35 | Oronasal mask | |
| 28O | 52 | 5 | Oronasal mask | |
| 29O | -14 | 49 | Nasal mask | |
| 30N | 4 | 38 | Nasal mask | |

**Abbreviations:** VAS = Visual analogue scale; PSG = Polysomnography;

O: Oronasal mask as interface at inclusion

N: Nasal mask as interface at inclusion

∆ = difference between results for oronasal mask subtracted by results for nasal mask (positive value indicating advantage for oronasal mask; negative value indicating advantage for nasal mask)

**Figure legends – online data supplement**

**Figure E1**: Correlation of subjective evaluation of sleep and objective sleep efficiency concerning differences between nasal masks and oronasal masks

**Figure E1**

**Figure E2a**: Difference in sleep efficiency (mean ± SD) for oronasal and nasal mask in patients and their final preference of interface

Legend: Grey columns: Patient favored oronasal mask; White columns: Patient favored nasal mask

**Figure E2a**

**Figure E2b**: Difference in transcutaneous PCO2 (mean ± SD) for oronasal and nasal mask in patients and their final preference of interface

Legend: Grey columns: Patient favored oronasal mask; White columns: Patient favored nasal mask

**Figure E2b**
